# Supplementary material for: Cerebral collateral therapeutics in acute ischemic stroke: A randomized preclinical trial of four modulation strategies
Source: PubMed Central journal article supplement — J Cereb Blood Flow Metab. 2017 Jan 23;37(10):3344–54. doi: 10.1177/0271678X16688705 (PMC5624388; doi:10.1177/0271678x16688705), 2017-01-23
Supplement: JCB688705_supplementary_material_705.pdf [file JCB688705_supplementary_material_705.pdf]

# Supplementary Material

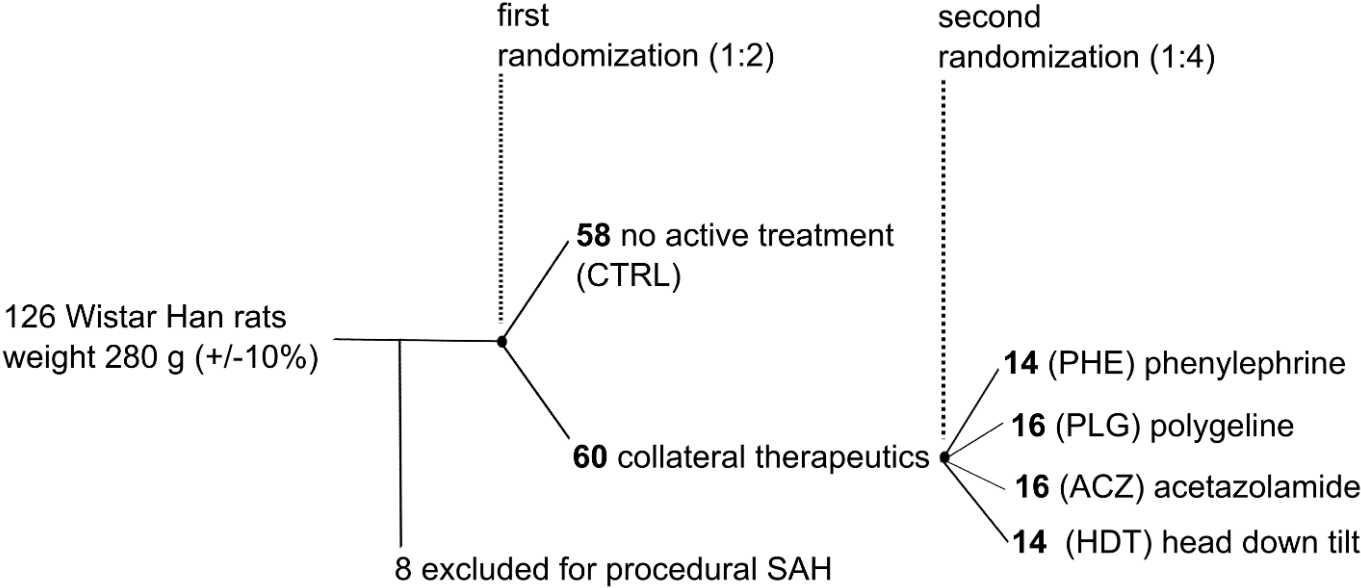

**Supplementary Figure 1.** Flow diagram of the randomized pre-clinical trial.

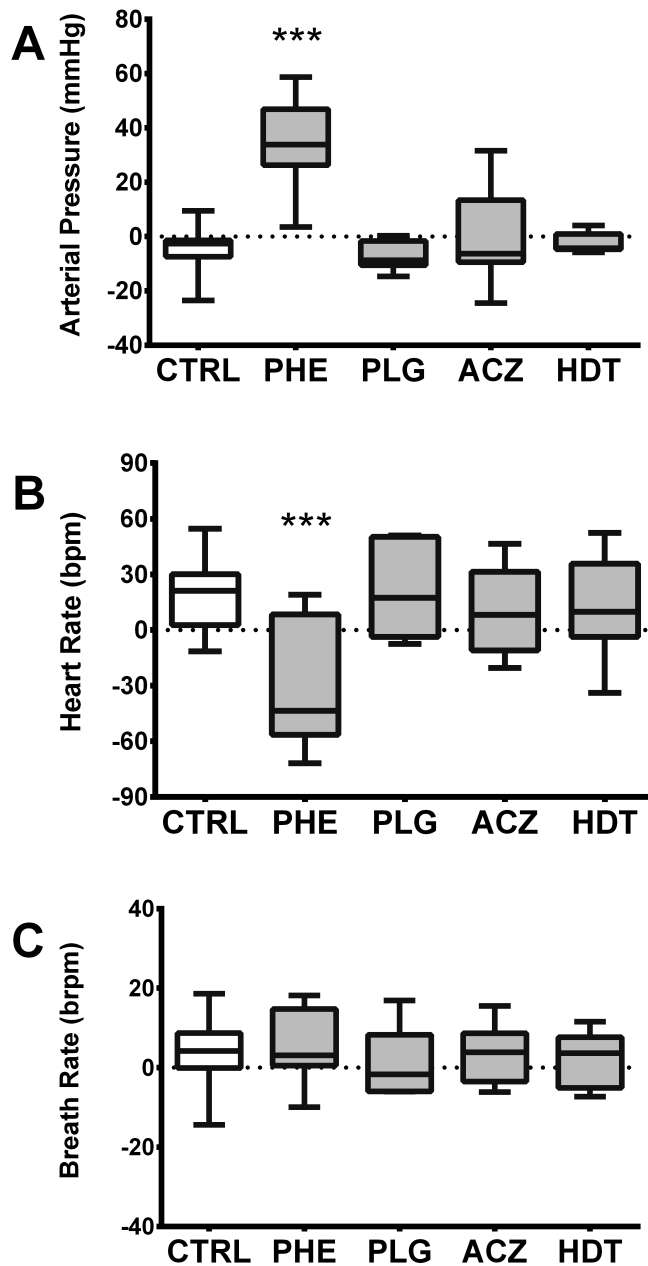

**Supplementary Figure 2.** Effect of collateral therapeutics on cardiorespiratory parameters. Absolute changes in mean arterial pressure (A), heart rate (B), and respiratory rate (C) after treatment with collateral therapeutics are shown, compared with pre-treatment values. The mean of cardiorespiratory parameters in the first 30 minutes of MCA occlusion of untreated rats (CTRL) was set to zero and the graph represents the net changes in the last 60 minutes for all groups. \*\*\*  $p < 0.001$  compared to untreated. bpm = beats per minute. brpm = breaths per minute.

**Supplementary Table 1.** Treatment-related mortality. The drug and cause of death is reported for each of the 4 animals which died after treatment.

| <b>n</b> | <b>collateral therapeutic</b> | <b>cause of death</b>                                          |
|----------|-------------------------------|----------------------------------------------------------------|
| 1        | phenylephrine                 | subarachnoid hemorrhage occurred after initiation of treatment |
| 2        | polygeline                    | cardiorespiratory failure                                      |
| 3        | acetazolamide                 | subarachnoid hemorrhage occurred after initiation of treatment |
| 4        | acetazolamide                 | unknown                                                        |
